# Supplementary figures and images for: Effect of Cucumber Continuous Monocropping on Traditional Chinese Medicine Residue through Analysis of Physicochemical Characteristics and Microbial Diversity
Source: MDPI journal article supplement (doi:10.3390/agronomy14040709), 2024-03-28

LefSe analysis

The current LDA threshold is 2

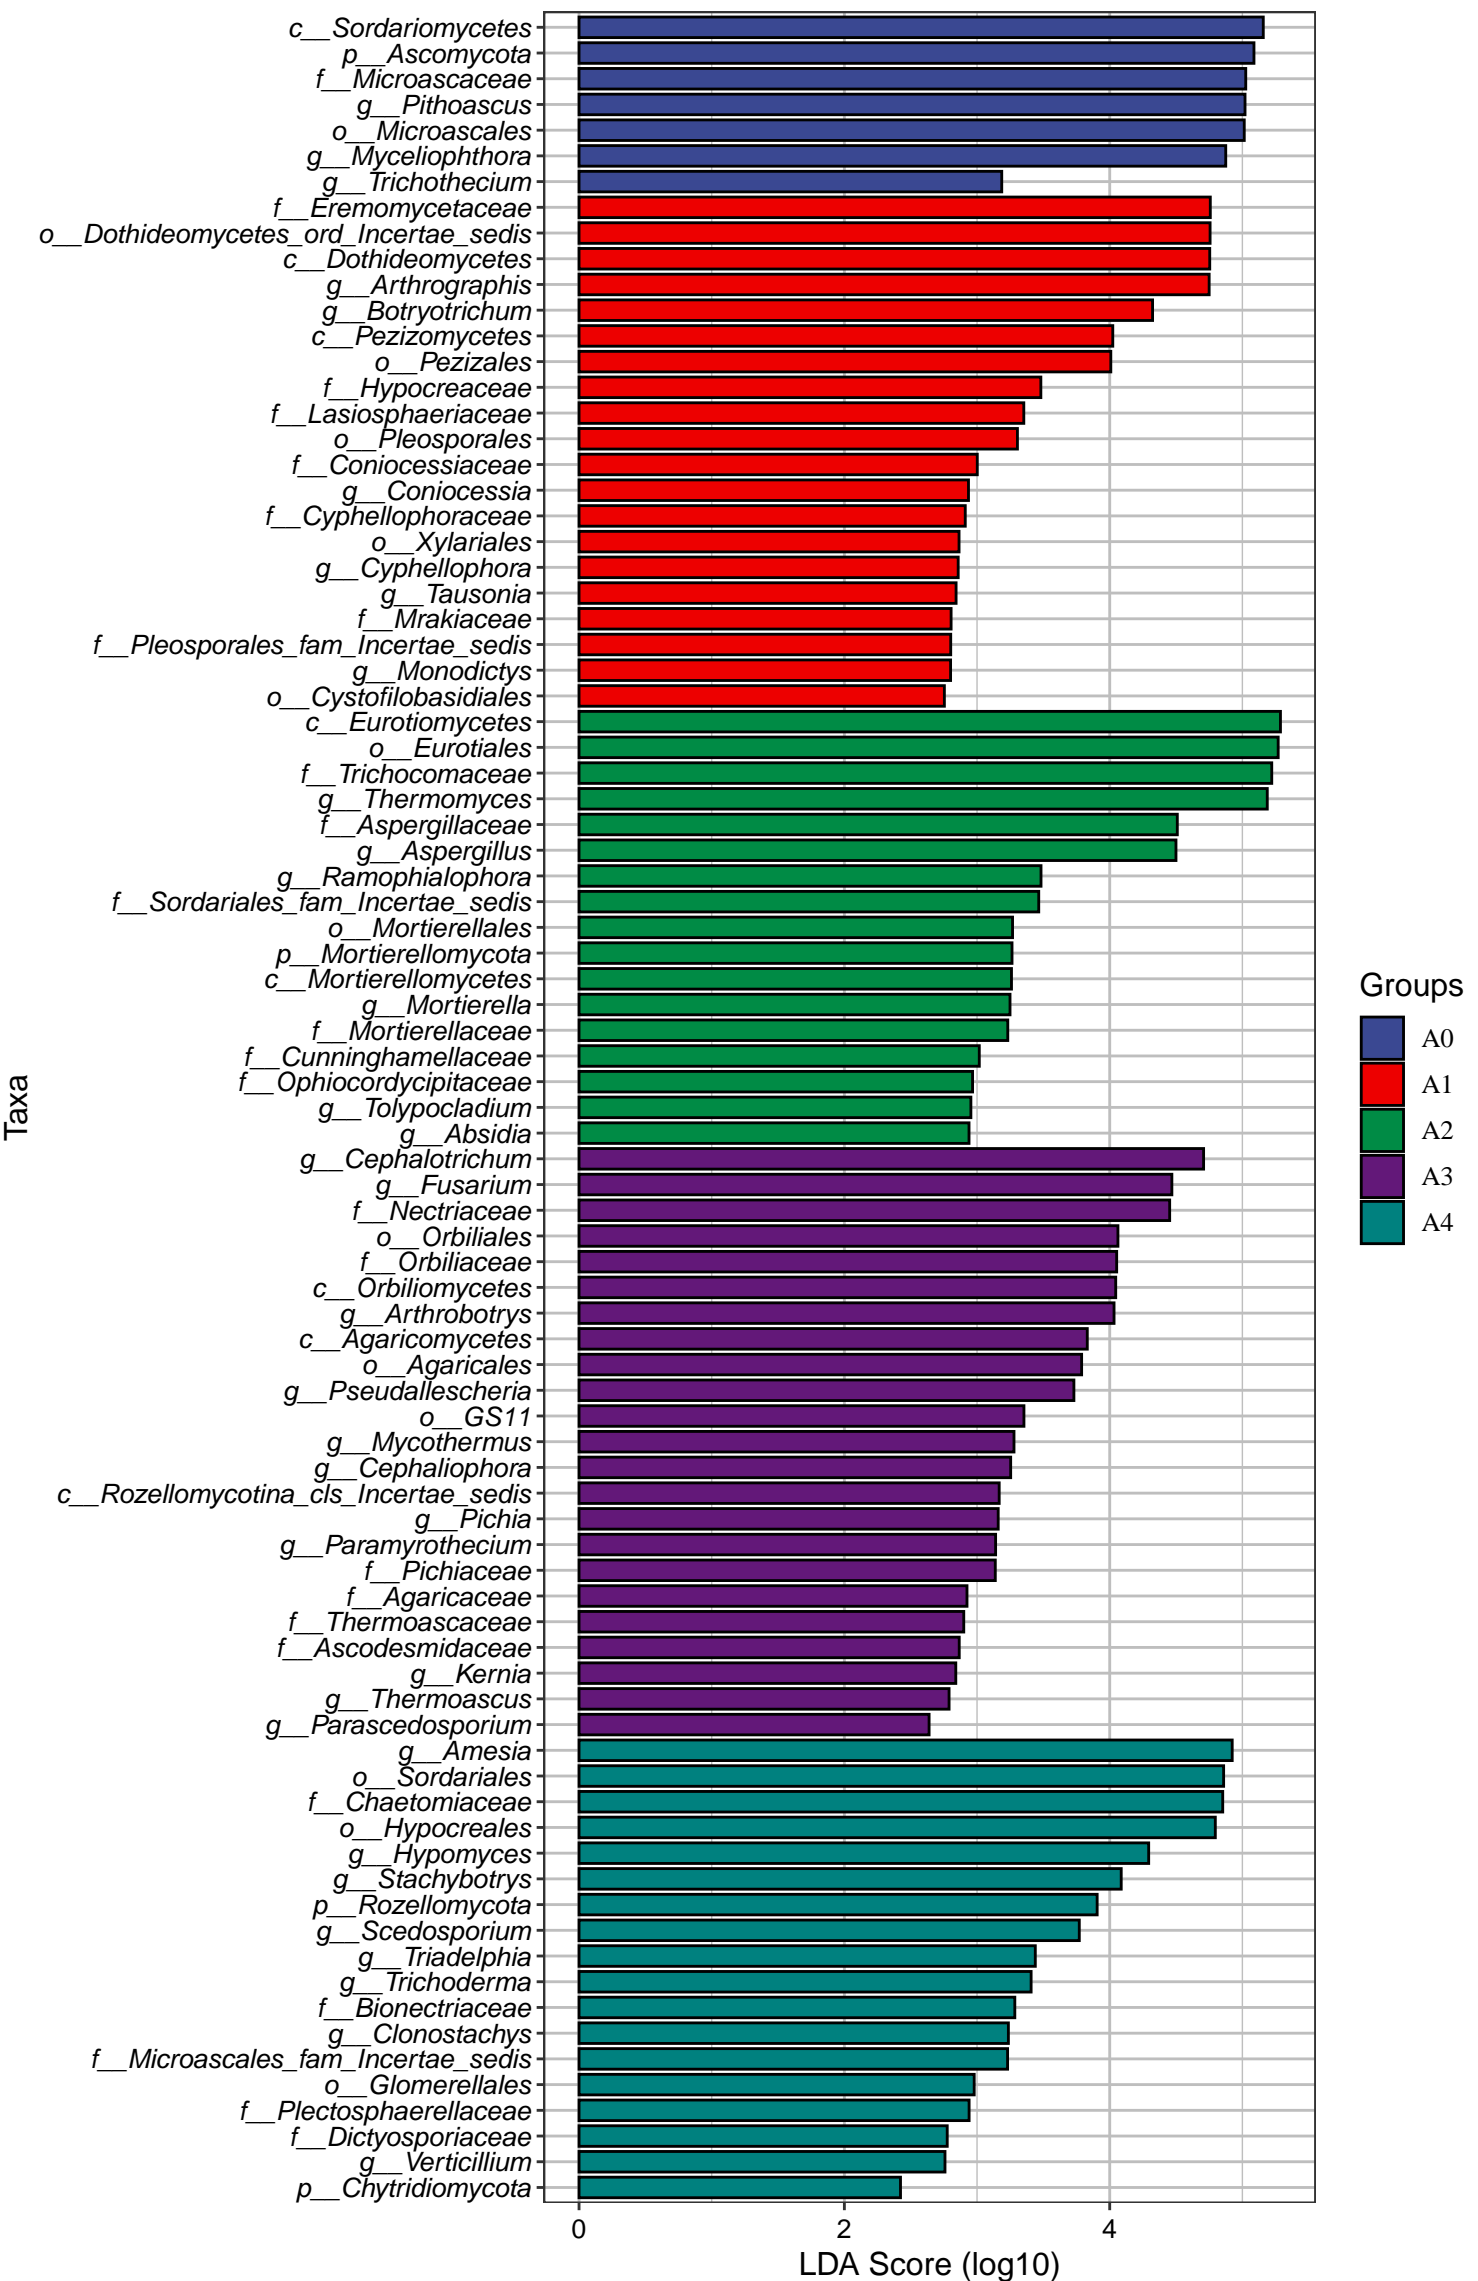

Supplement: s1 [file s1]

The current LDA threshold is 3.6

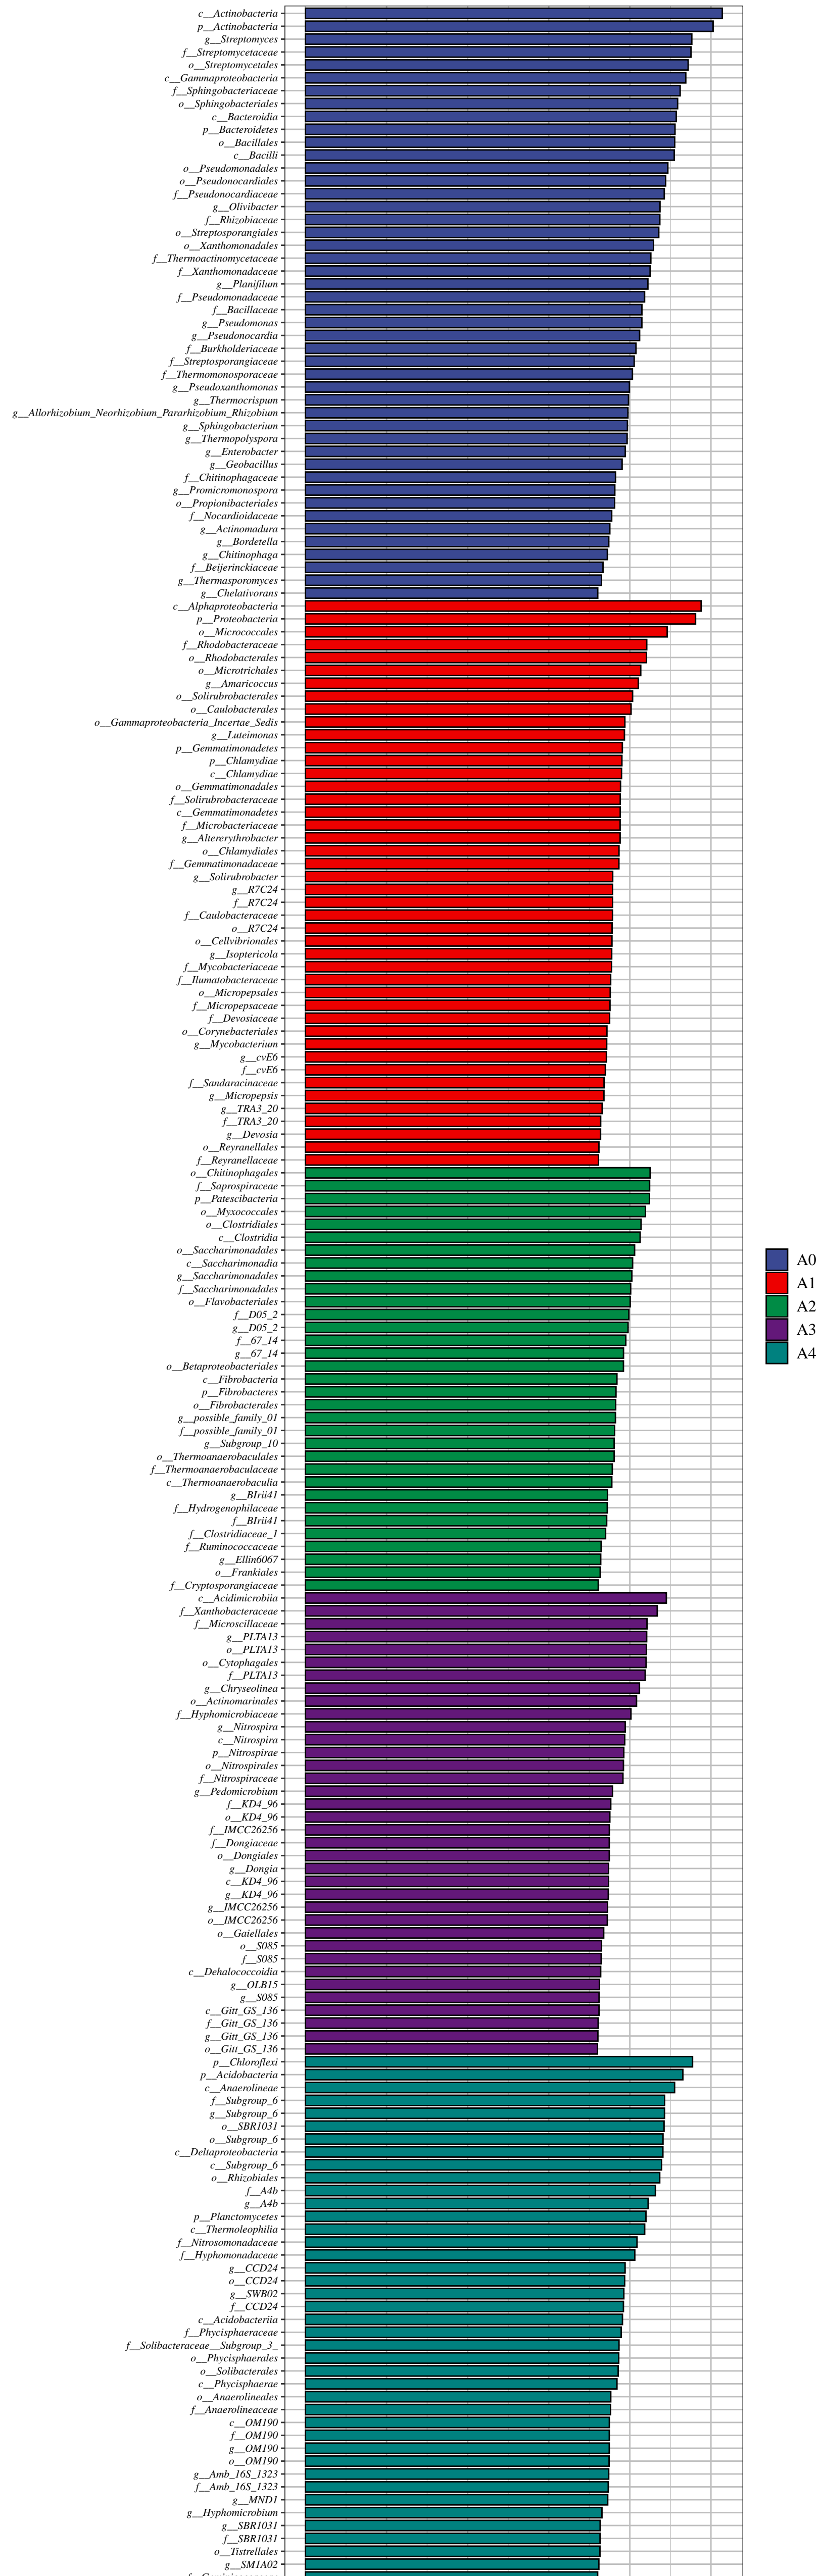

Supplement: s1 [file s1]
